# Supplementary material
Source: PubMed Central journal article supplement (PMC7099531)
Supplement: NIHMS1571743-supplement-Supplement.pdf [file NIHMS1571743-supplement-Supplement.pdf]

## Supplementary Online Content

Hernandez I, Hershey TB, Donohue JM. Drug shortages in the United States: are some prices too low. *JAMA*. doi:10.1001/jama.2019.20504

**eFigure.** Generic Drug Manufacturing and Purchasing System

This supplementary material has been provided by the authors to give readers additional information about their work.

**eFigure.** Generic Drug Manufacturing and Purchasing System

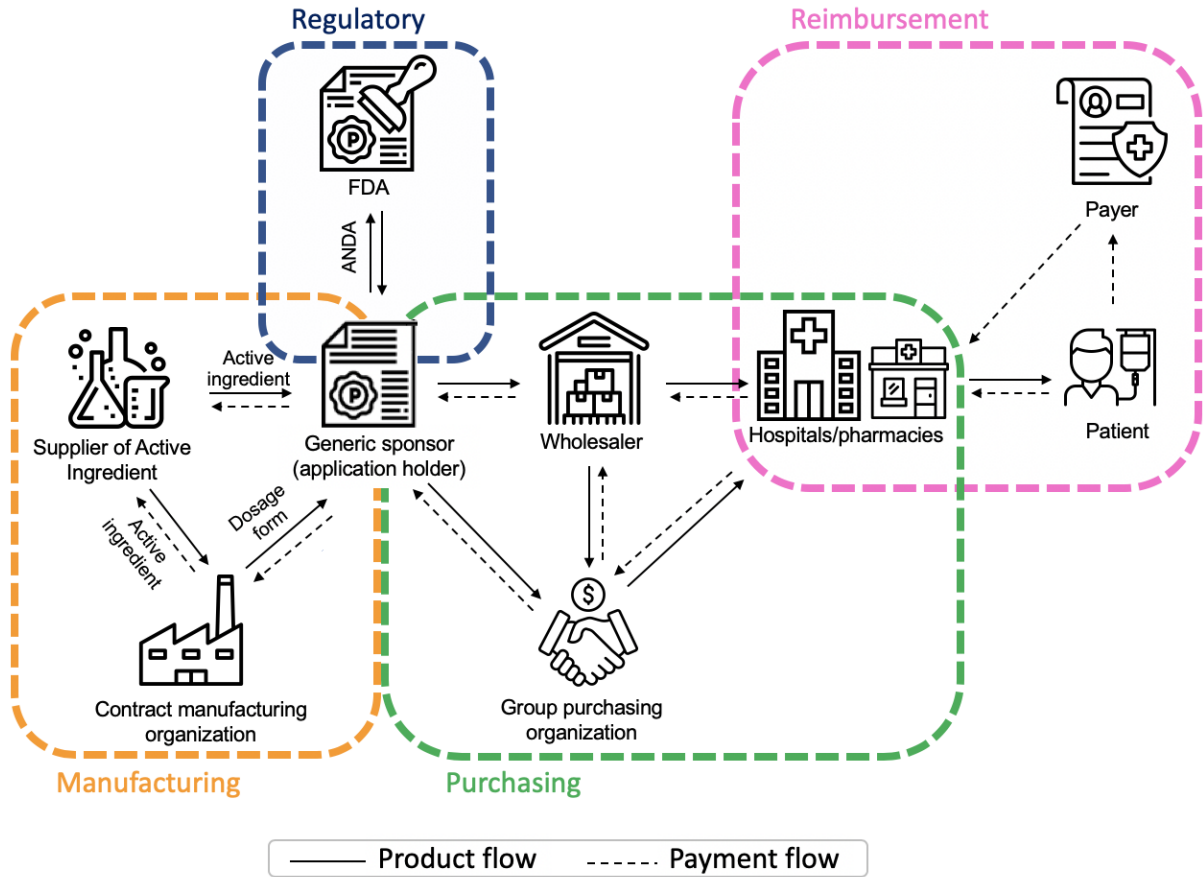

The generic drug manufacturing and purchasing system includes regulatory approval provided by the US Food and Drug Administration (FDA); the joint manufacturing enterprise of generic sponsors who hold abbreviated new drug applications (ANDAs), suppliers of active ingredients, and contract manufacturing organizations; drug purchasing by health systems and pharmacies who often go through intermediaries such as group purchasing organizations or wholesalers; and reimbursement that flows from patients and payers (eg, insurance companies, Medicare) to the health systems and pharmacies that administer or dispense drugs to patients. Solid arrows indicate the direction of the flow of generic drug products or services; dotted arrows, the flow of payment.
